# Supplementary material for: Molecular dynamic simulations of Escherichia colil-asparaginase to illuminate its role in deamination of asparagine and glutamine residues
Source: PubMed Central journal article supplement (PMC4695448; doi:10.1007/s13205-015-0339-9), 2015-12-29

### 1NNS binding Sites by FT Site Tool

| Site 1 Residues | Site 2 Residues | Site 3 Residues |
|-----------------|-----------------|-----------------|
| SER A 120       | SER A 19        | PHE A 127       |
| SER A 122       | ALA A 20        | ASN A 131       |
| ALA A 123       | THR A 21        | ASP A 152       |
| PRO A 126       | LYS A 22        | ILE A 182       |
| PHE A 127       | SER A 23        | HIS A 183       |
| SER B 120       | ARG A 116       | ASN A 184       |
| SER B 122       | PRO A 117       | GLY A 185       |
| ALA B 123       | SER A 120       | ALA B 20        |
| PRO B 126       | MET A 121       | THR B 21        |
| PHE B 127       | PHE B 127       | LYS B 22        |
|                 | ASN B 131       | SER B 23        |
|                 | ASP B 152       | ARG B 116       |
|                 | ILE B 182       | PRO B 117       |
|                 | HIS B 183       | SER B 120       |
|                 | ASN B 184       | MET B 121       |
|                 | GLY B 185       |                 |

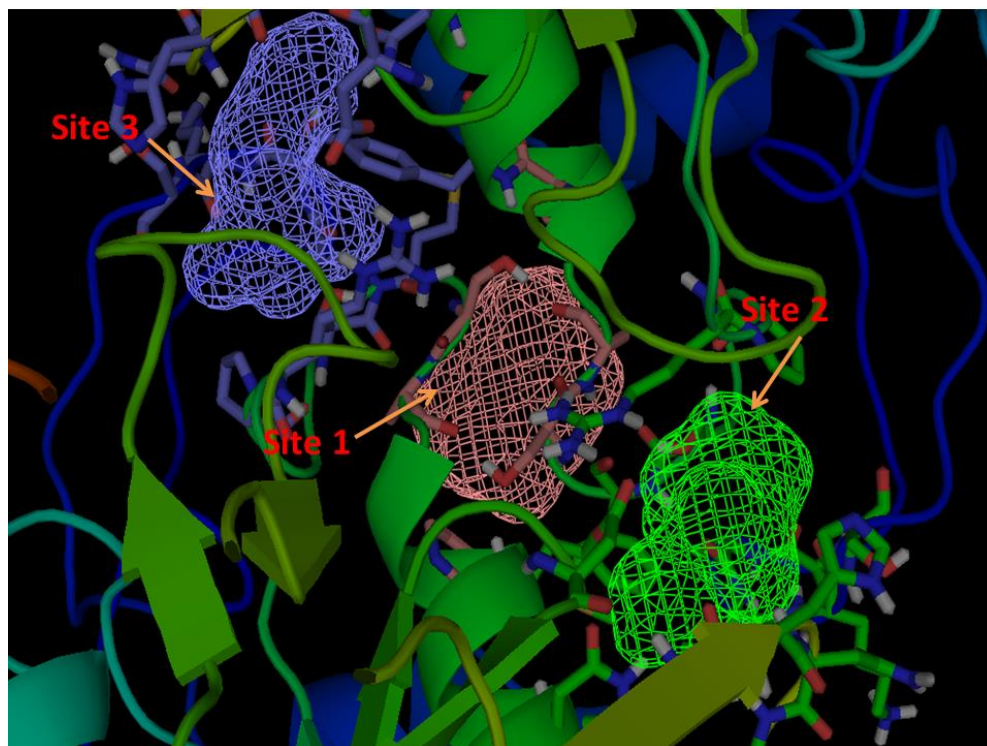

Supplement: 13205_2015_339_MOESM1_ESM.pdf [file 13205_2015_339_MOESM1_ESM.pdf]
